# Supplementary material for: Batch correction of microarray data substantially improves the identification of genes differentially expressed in Rheumatoid Arthritis and Osteoarthritis
Source: PubMed Central journal article supplement (PMC3528008; doi:10.1186/1755-8794-5-23), 2012-06-08

a)

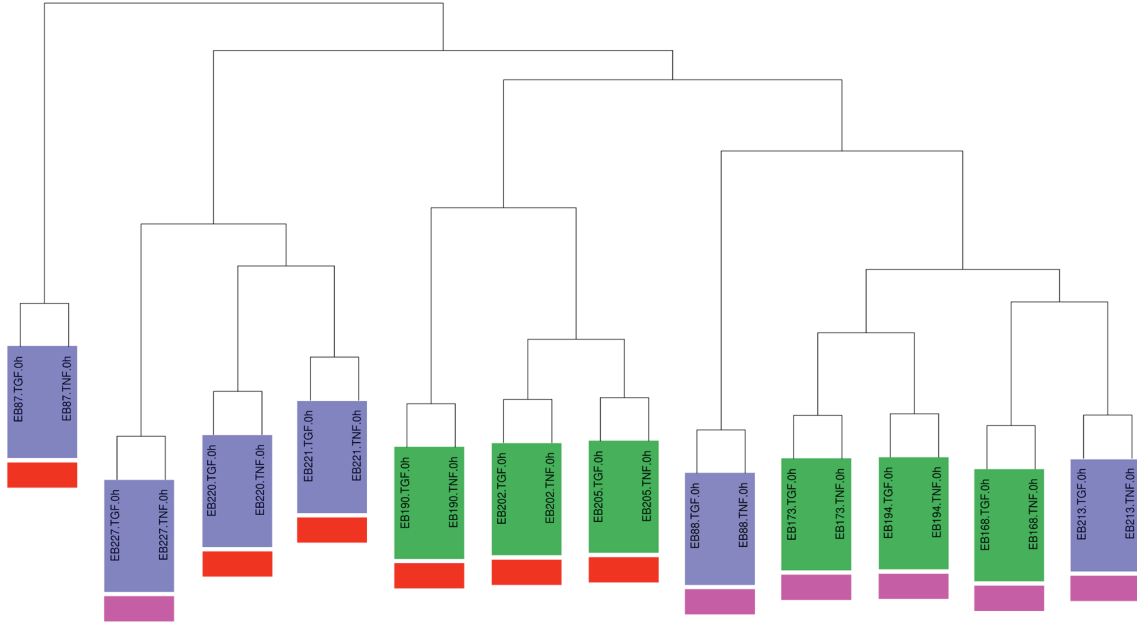

b)

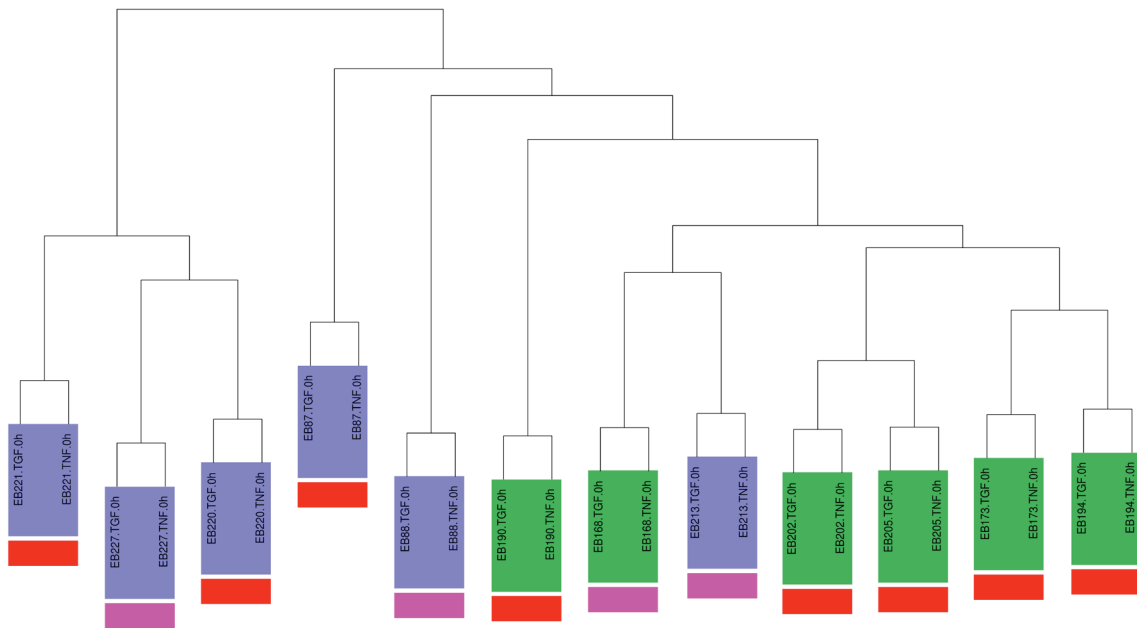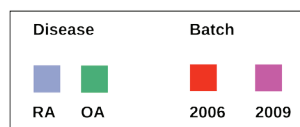

Supplement: 1755-8794-5-23-S2.pdf [file 1755-8794-5-23-S2.pdf]
