# Supplementary material for: Batch correction of microarray data substantially improves the identification of genes differentially expressed in Rheumatoid Arthritis and Osteoarthritis
Source: PubMed Central journal article supplement (PMC3528008; doi:10.1186/1755-8794-5-23), 2012-06-08
Supplement: 1755-8794-5-23-S7.pdf [file 1755-8794-5-23-S7.pdf]

10: Complete Cluster with Batch Correction and 2 groups (RA/OA), Permutation=1

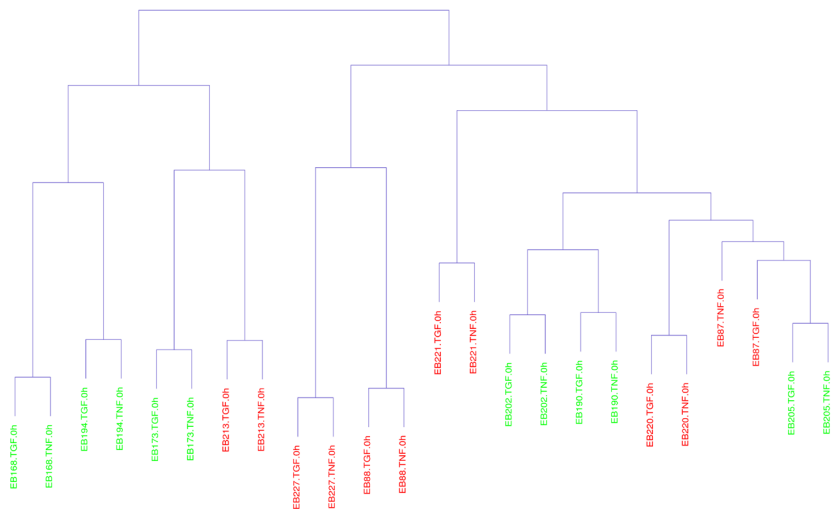

10: Complete Cluster with Batch Correction and 2 groups (RA/OA), Permutation=3

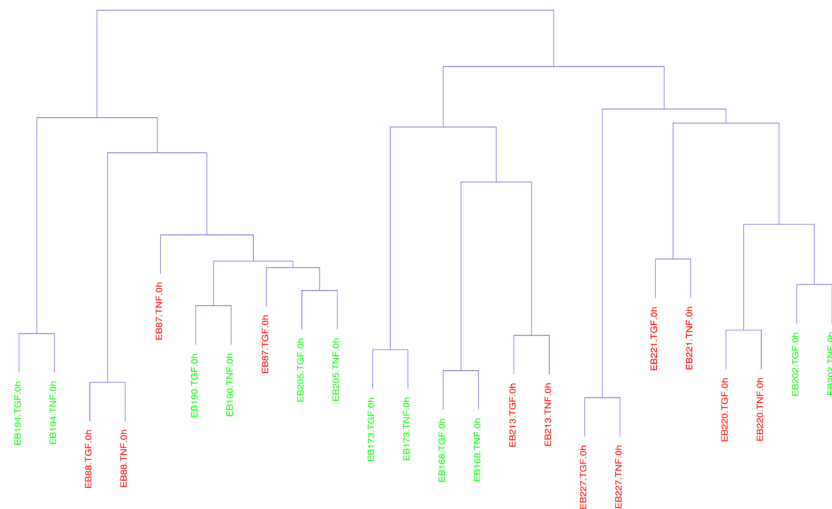

10: Complete Cluster with Batch Correction and 2 groups (RA/OA), Permutation=2

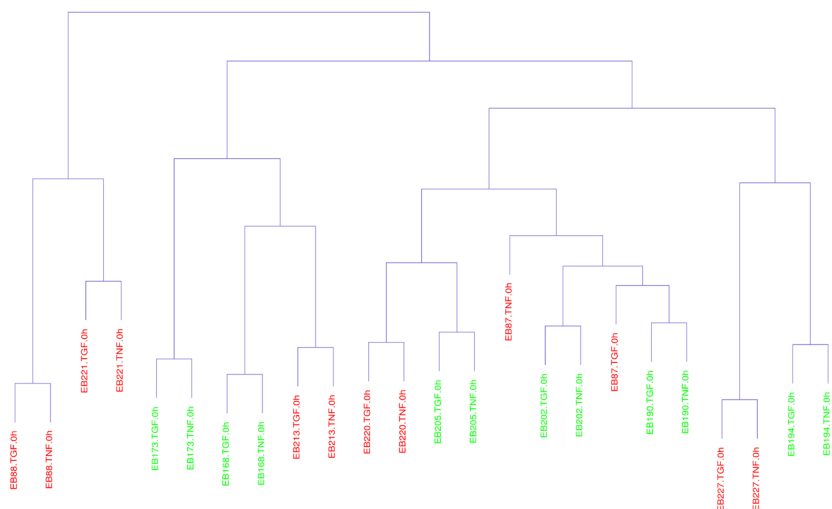

10: Complete Cluster with Batch Correction and 2 groups (RA/OA), Permutation=4

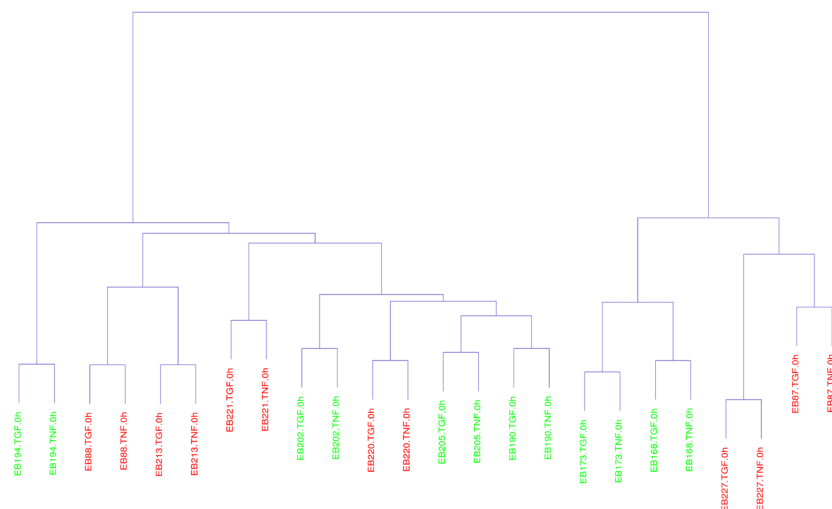

RA

OA

10: Complete Cluster with Batch Correction and 2 groups (RA/OA), Permutation=5

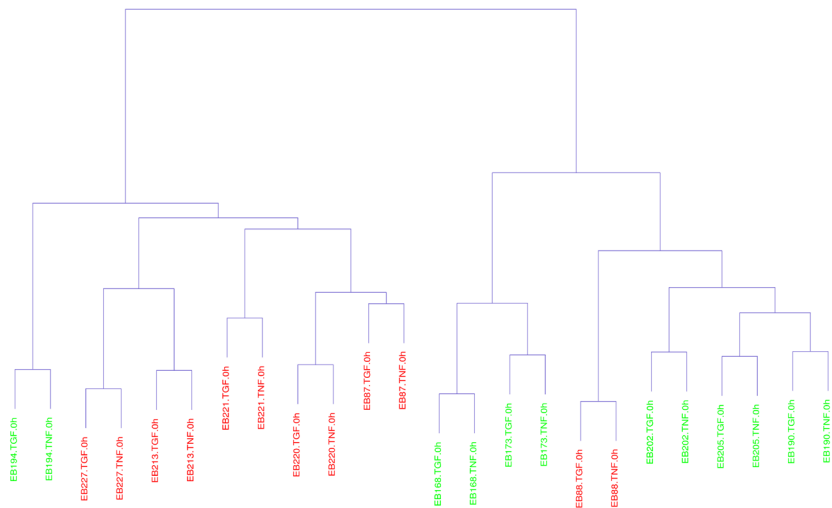

10: Complete Cluster with Batch Correction and 2 groups (RA/OA), Permutation=7

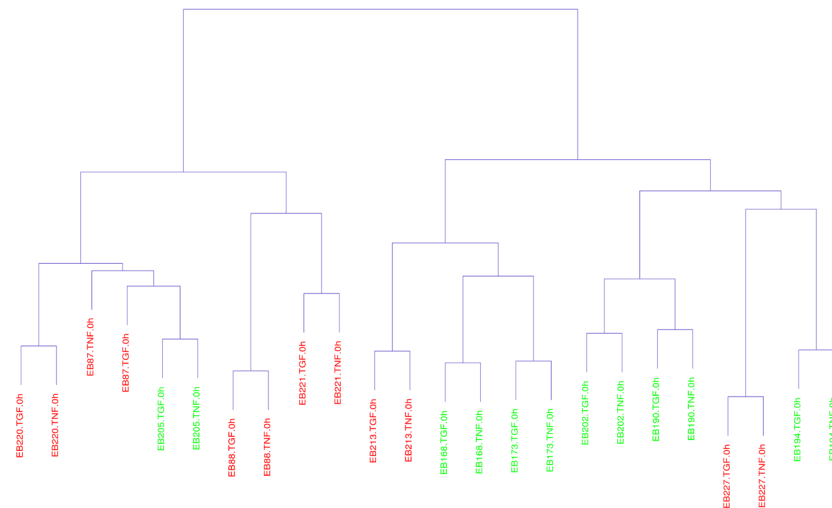

10: Complete Cluster with Batch Correction and 2 groups (RA/OA), Permutation=6

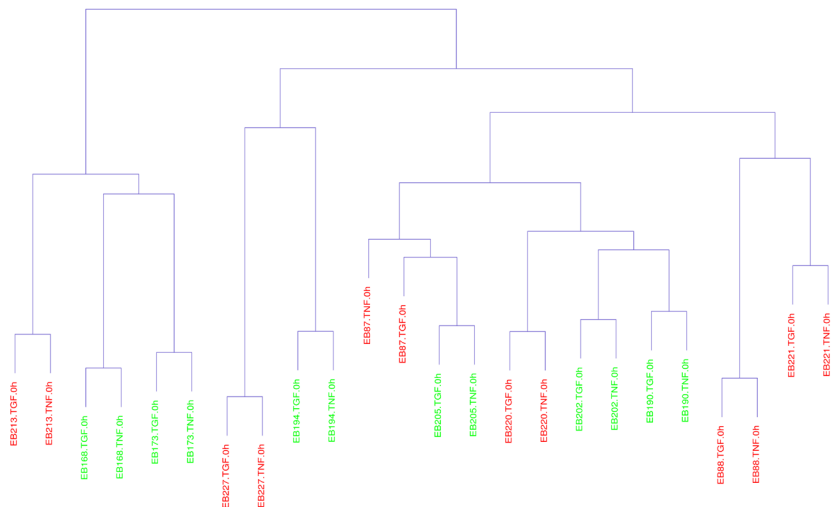

10: Complete Cluster with Batch Correction and 2 groups (RA/OA), Permutation=8

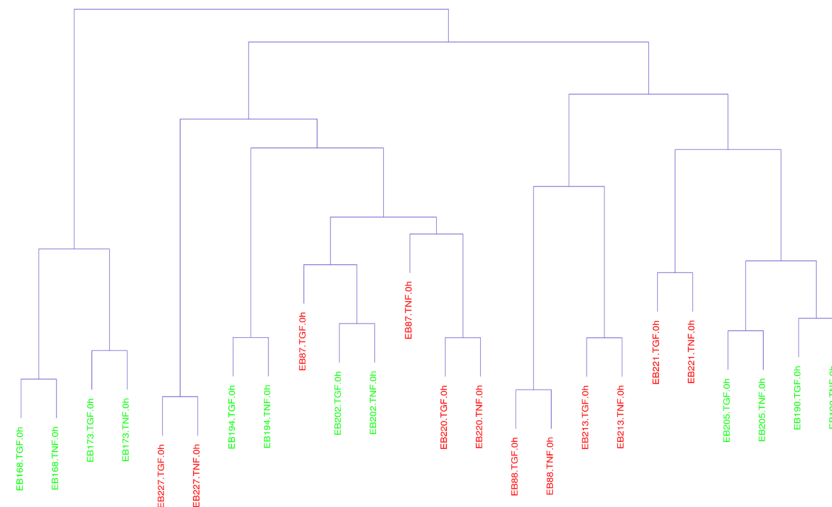

RA

OA

t0: Complete Cluster with Batch Correction and 2 groups (RA/OA), Permutation=9

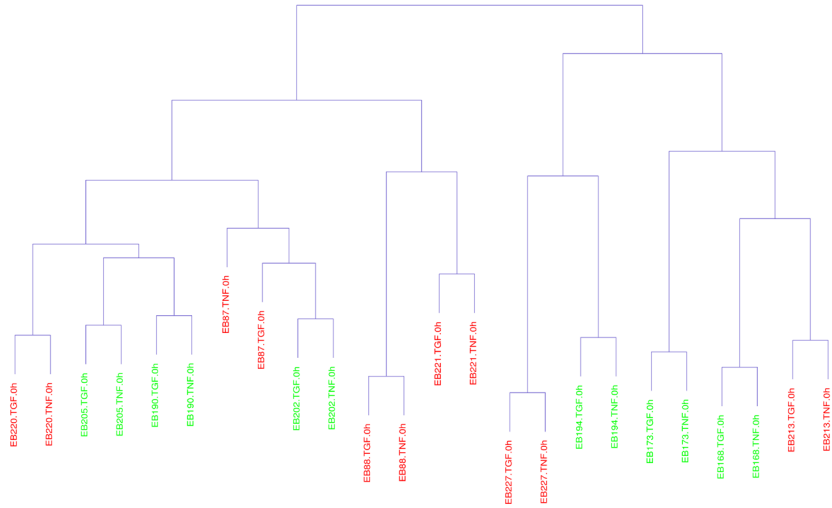

t0: Complete Cluster with Batch Correction and 2 groups (RA/OA), Permutation=11

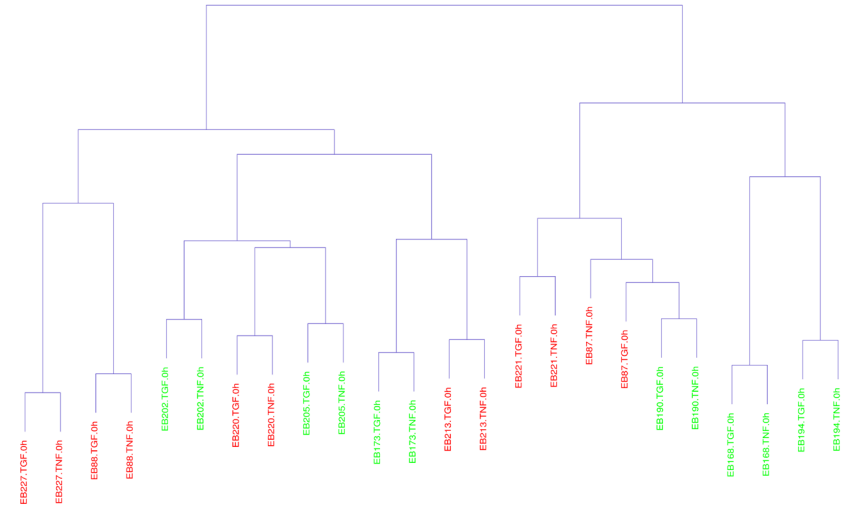

t0: Complete Cluster with Batch Correction and 2 groups (RA/OA), Permutation=10

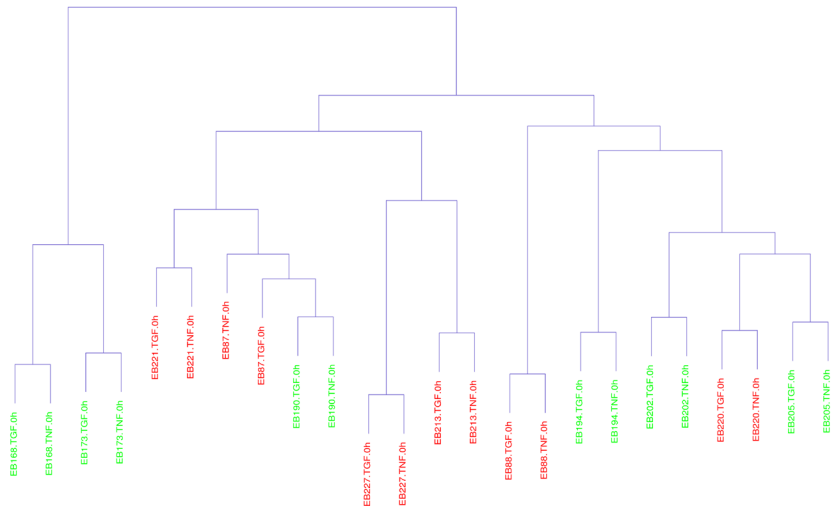

t0: Complete Cluster with Batch Correction and 2 groups (RA/OA), Permutation=12

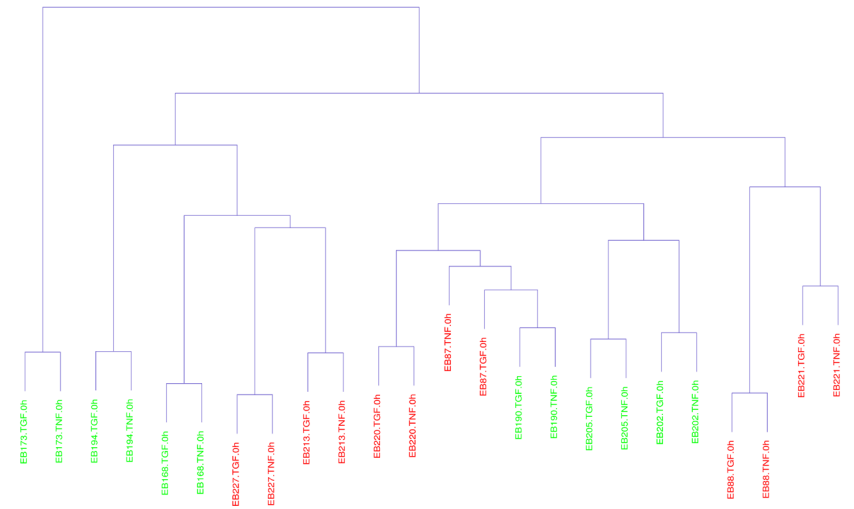

RA

OA

t0: Complete Cluster with Batch Correction and 2 groups (RA/OA), Permutation=13

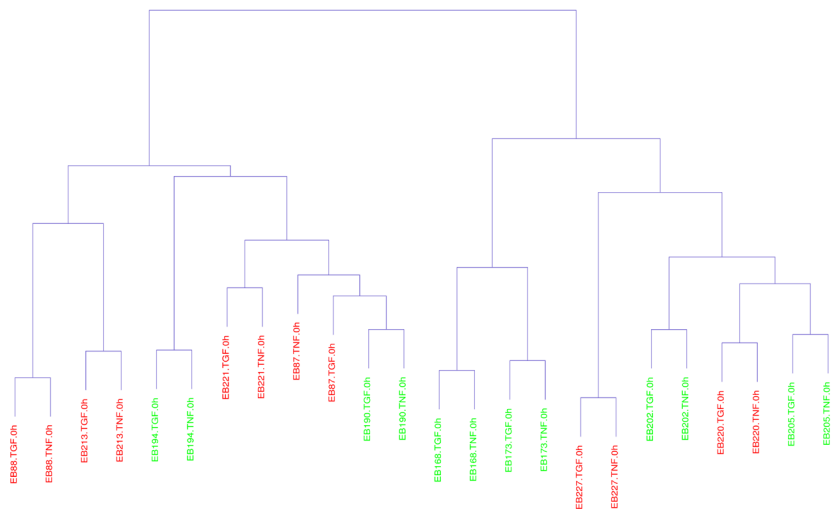

t0: Complete Cluster with Batch Correction and 2 groups (RA/OA), Permutation=15

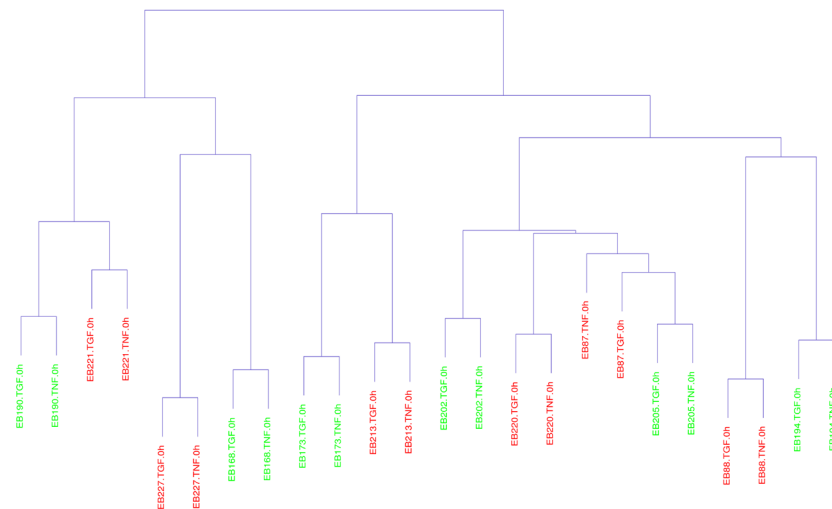

t0: Complete Cluster with Batch Correction and 2 groups (RA/OA), Permutation=14

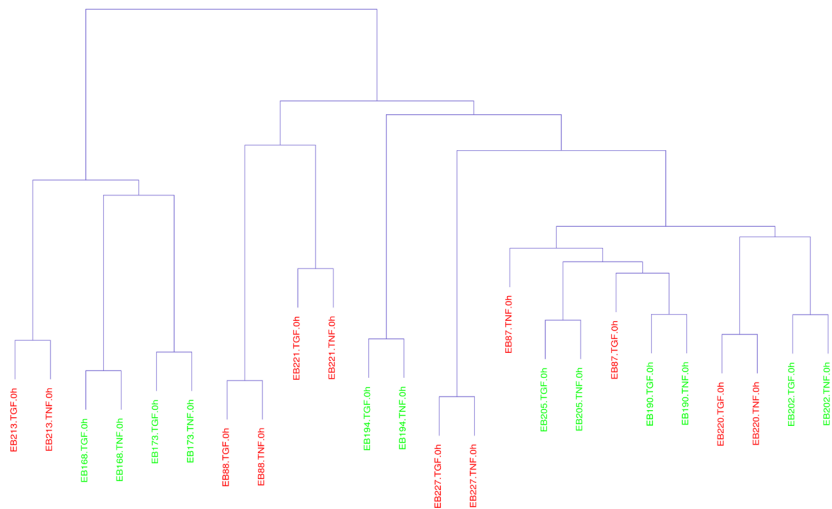

t0: Complete Cluster with Batch Correction and 2 groups (RA/OA), Permutation=16

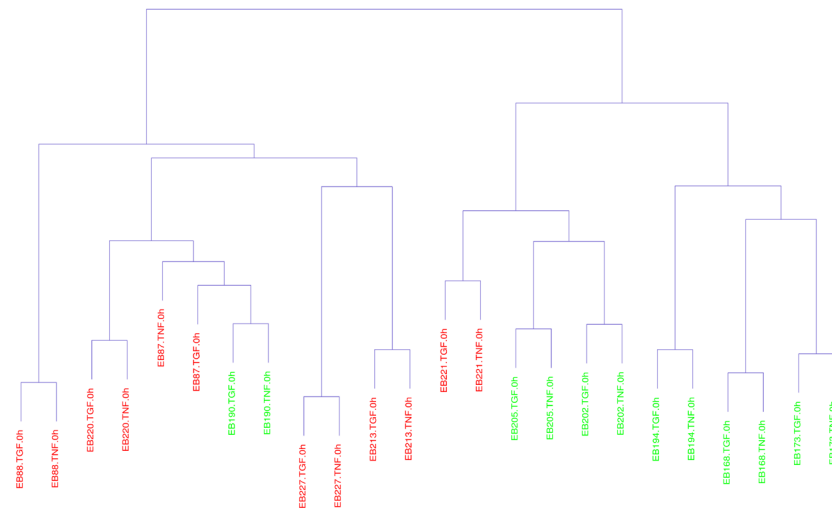

RA

OA

t0: Complete Cluster with Batch Correction and 2 groups (RA/OA), Permutation=17

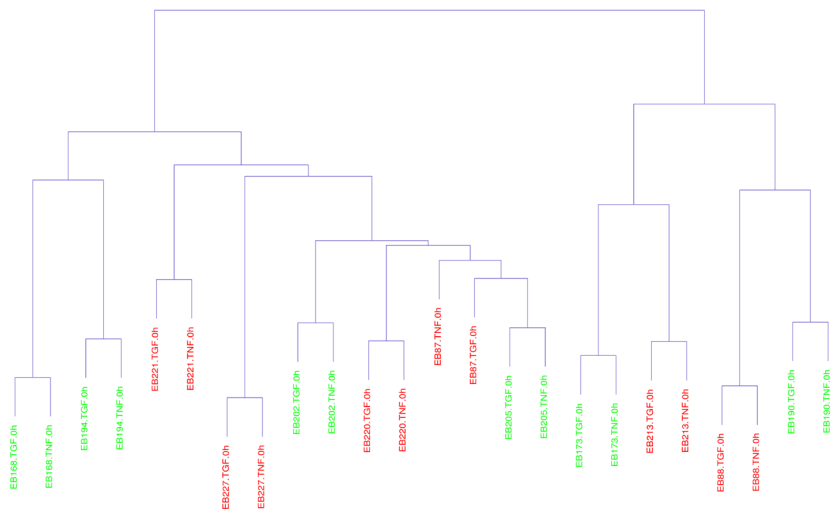

t0: Complete Cluster with Batch Correction and 2 groups (RA/OA), Permutation=19

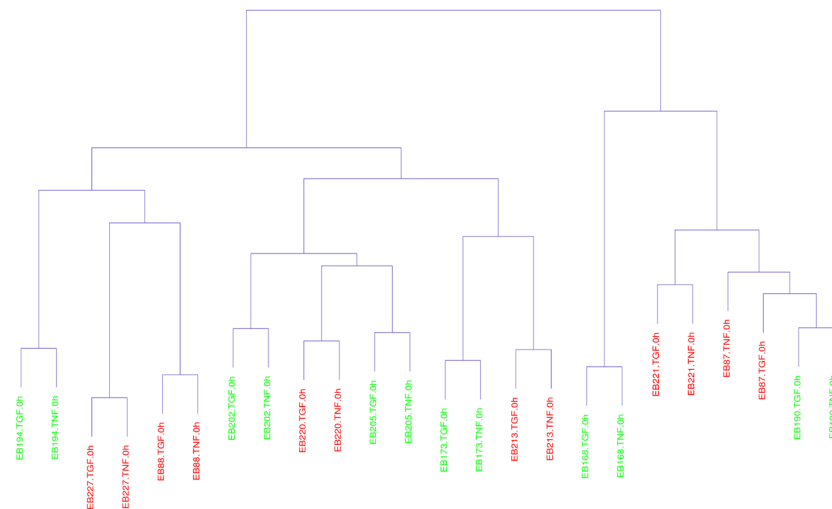

t0: Complete Cluster with Batch Correction and 2 groups (RA/OA), Permutation=18

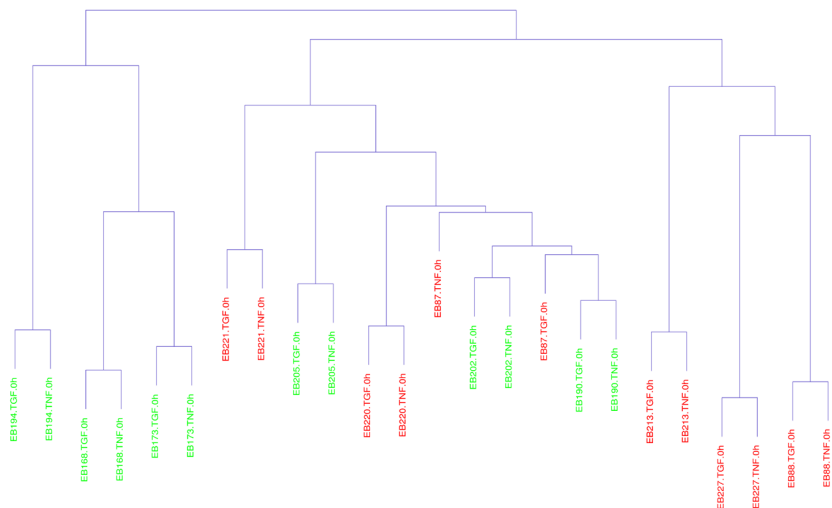

t0: Complete Cluster with Batch Correction and 2 groups (RA/OA), Permutation=20

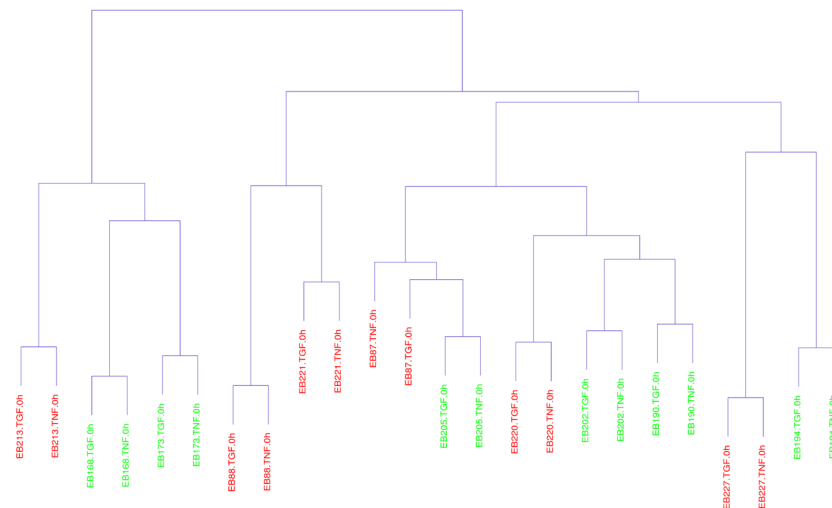

RA

OA
